# Supplementary material for: Regenerative Efficacy of Supercritical Carbon Dioxide-Derived Bone Graft Putty in Rabbit Bone Defect Model
Source: MDPI journal article supplement (doi:10.3390/biomedicines10112802), 2022-11-03

Supplementary Figure S1

Radiographic quantification of resorption of the bone graft and putty after implantation

Comparative analysis: 4 weeks Vs 12 weeks

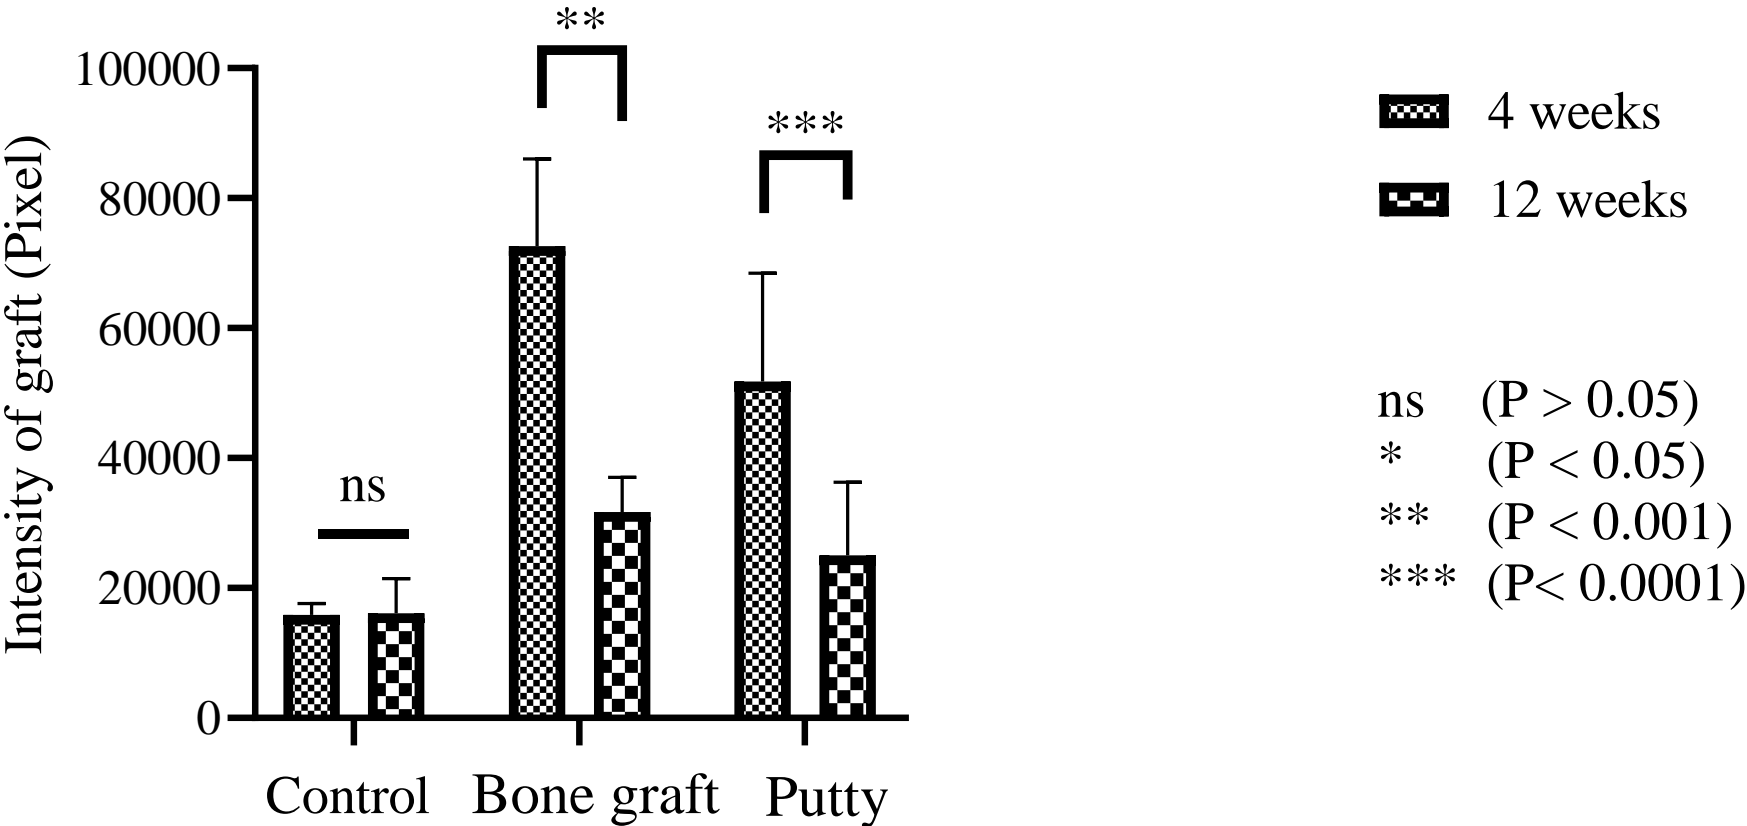

Supplementary Figure S2

μ-CT signal quantification of resorption of the bone graft and putty after implantation

Comparative analysis: 4 weeks Vs 12 weeks

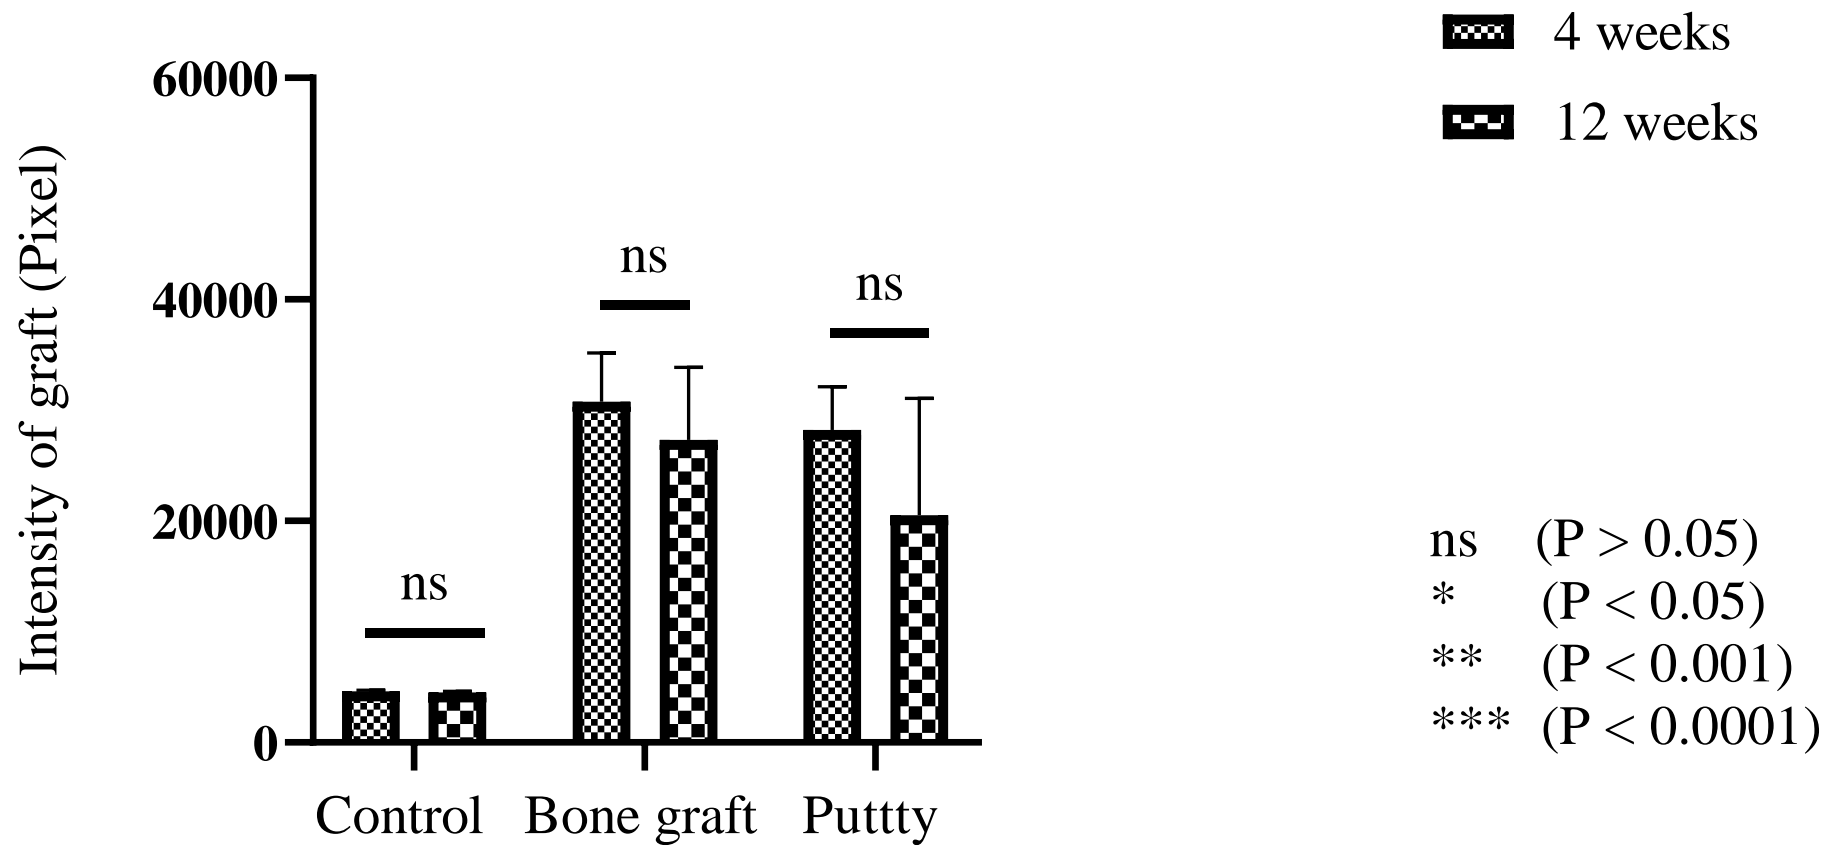

Supplementary Figure S3

Masson trichrome staining quantification of new bone formation in the bone graft and putty after implantation.

Comparative analysis: 4 weeks Vs 12 weeks

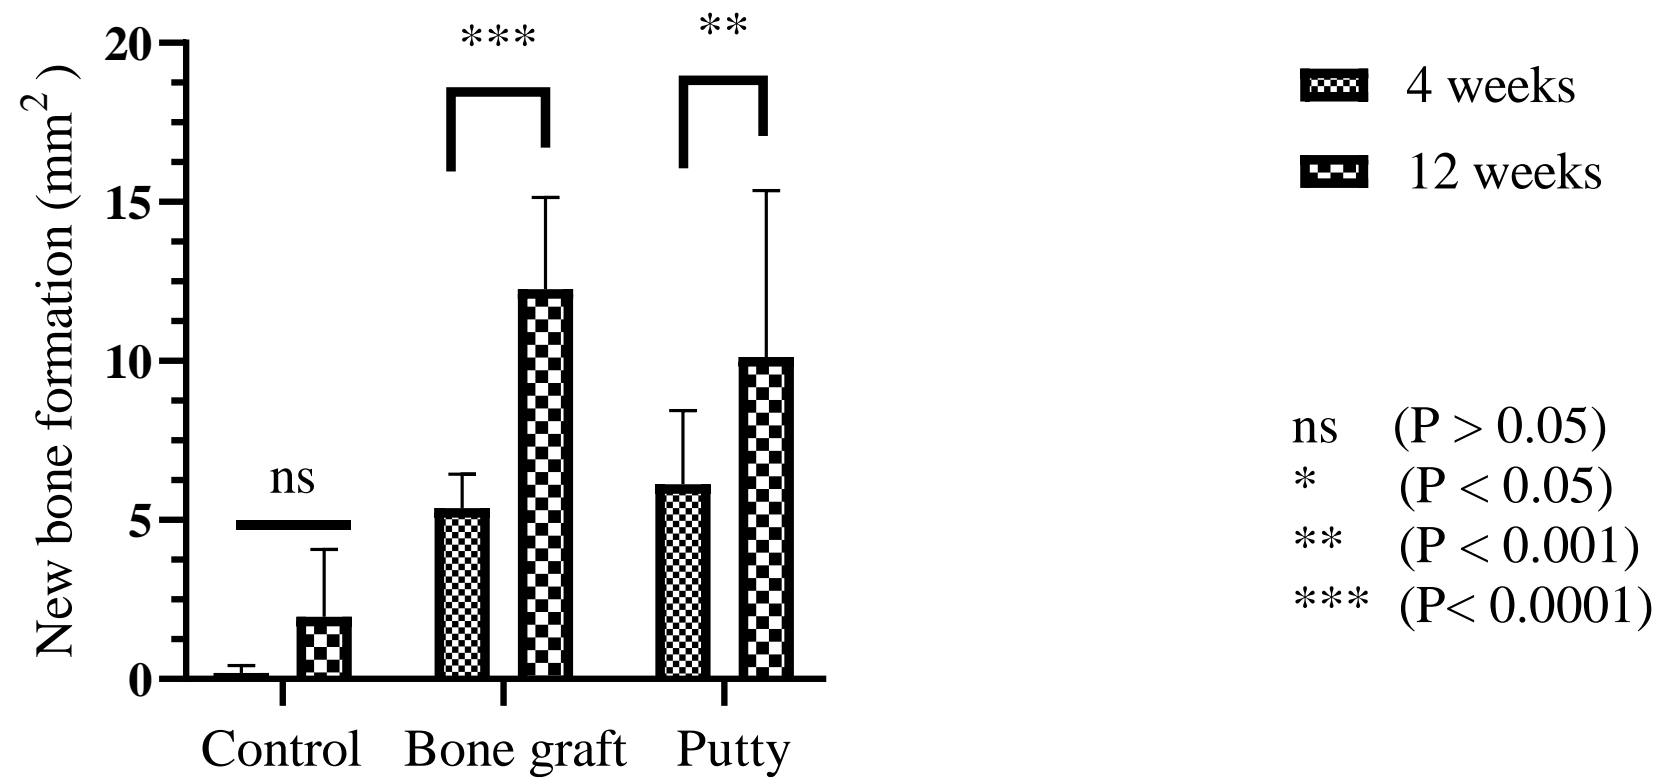

Supplementary Figure S4

Alizarin Red S staining quantification of new bone formation in the bone graft and putty after implantation

Comparative analysis: 4 weeks Vs 12 weeks

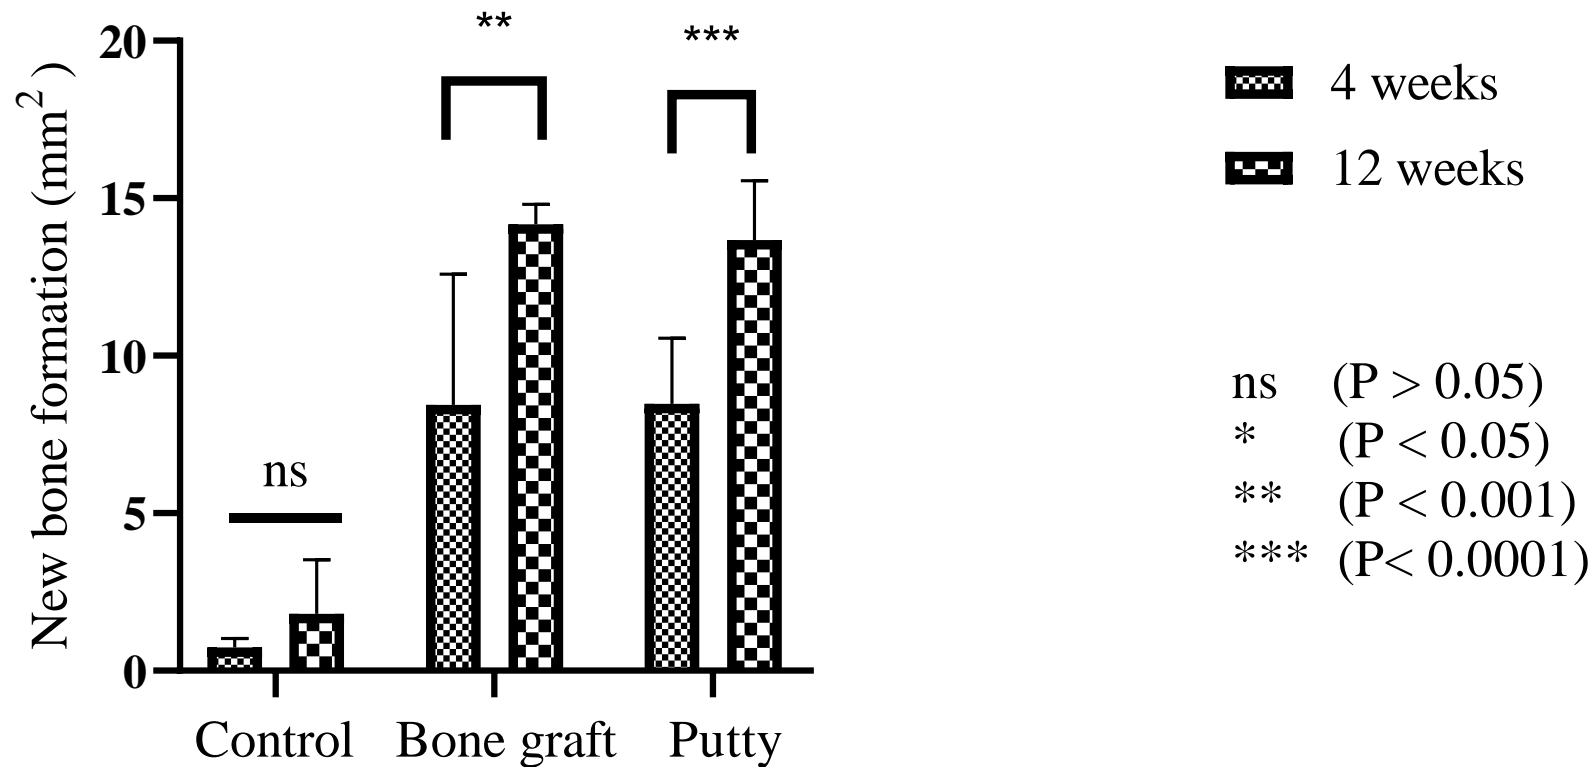

Supplement: s1 [file s1]
